Correction

# Correction: Texting and Walking: Strategies for Postural Control and Implications for Safety

The PLOS ONE Staff

Figure 1 is distorted. This error occurred while the article was being prepared for publication. Please see the correct Figure 1 here:

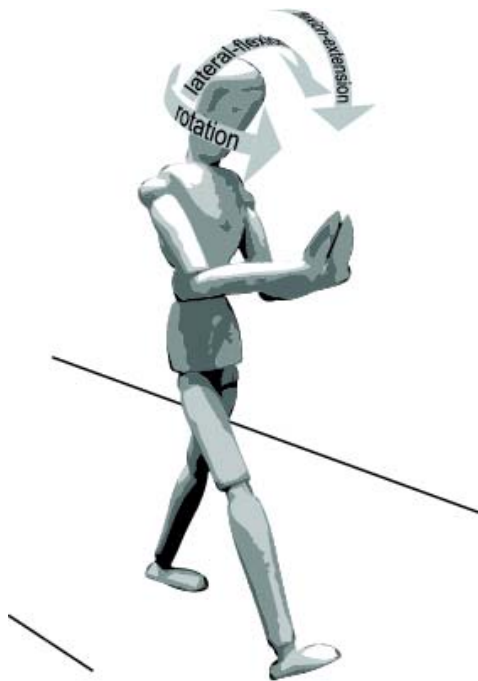

doi:10.1371/journal.pone.0084312.g001

## Reference

- Schabrun SM, van den Hoorn W, Moorcroft A, Greenland C, Hodges PW (2014) Texting and Walking: Strategies for Postural Control and Implications for Safety. PLoS ONE 9(1): e84312. doi:10.1371/journal.pone.0084312

**Citation:** The PLOS ONE Staff (2014) Correction: Texting and Walking: Strategies for Postural Control and Implications for Safety. PLoS ONE 9(2): e91489. doi:10.1371/journal.pone.0091489

**Published:** February 28, 2014

**Copyright:** © 2014 The PLOS ONE Staff. This is an open-access article distributed under the terms of the Creative Commons Attribution License, which permits unrestricted use, distribution, and reproduction in any medium, provided the original author and source are credited.
